# Supplementary material
Source: ML conference proceedings conference paper supplement (https://openreview.net/forum?id=_n59kgzSFef)
Supplement: supplementary_material [file attachment]

## A Appendix

Table 3 shows runtimes for each of the three Circa optimizations compared to ReLU baseline runtime.

Table 3: PI Runtime in seconds for baseline ReLU, naive sign and Circa stochastic ReLUs

| Network-Dataset | #ReLUs (K) | ReLU  | Sign  | $\widetilde{\text{Sign}}$ | $\widetilde{\text{Sign}}_k$ |
|-----------------|------------|-------|-------|---------------------------|-----------------------------|
| Res32-C100      | 303.10     | 6.32  | 5.51  | 4.50                      | 2.47                        |
| Res18-C100      | 557.00     | 11.05 | 9.83  | 8.15                      | 4.15                        |
| VGG16-C100      | 284.67     | 5.89  | 5.01  | 4.59                      | 2.25                        |
| Res32-Tiny      | 1212.42    | 24.24 | 19.45 | 16.00                     | 9.04                        |
| Res18-Tiny      | 2228.24    | 44.55 | 35.74 | 29.40                     | 14.28                       |
| VGG16-Tiny      | 1114.10    | 21.41 | 17.91 | 14.68                     | 6.96                        |
